# Supplementary material for: Distal regulation of c-myb expression during IL-6-induced differentiation in murine myeloid progenitor M1 cells
Source: PubMed Central journal article supplement (PMC5059869; doi:10.1038/cddis.2016.267), 2016-09-08

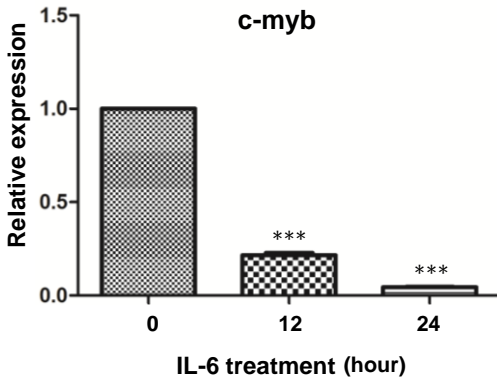

Supplement: cddis2016267x2.pdf [file cddis2016267x2.pdf]
