# Supplementary material for: Distal regulation of c-myb expression during IL-6-induced differentiation in murine myeloid progenitor M1 cells
Source: PubMed Central journal article supplement (PMC5059869; doi:10.1038/cddis.2016.267), 2016-09-08

**A**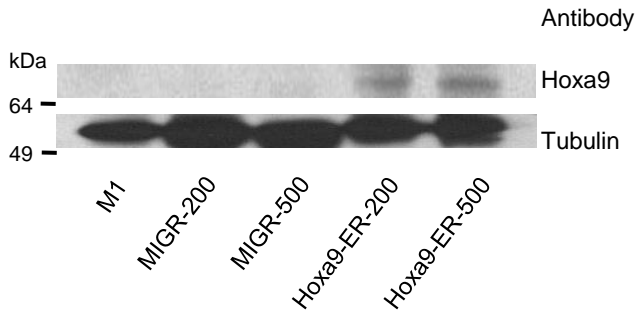**B**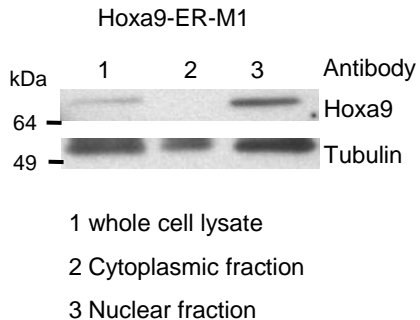

Supplement: cddis2016267x4.pdf [file cddis2016267x4.pdf]
